# Supplementary material for: The enhanced photoactivity of hydrogenated TiO2@reduced graphene oxide with p–n junctions
Source: Royal Society of Chemistry journal article supplement (doi:10.1039/c4ra15819a), 2015-01-01
Supplement: c4ra15819a1.pdf [file c4ra15819a1.pdf]

Cite this: DOI: 10.1039/c0xx00000x

www.rsc.org/xxxxxx

ARTICLE TYPE

## Electronic Supplementary Information for “The Enhanced Photoactivity of Hydrogenated TiO<sub>2</sub> @ Reduced Graphene Oxide with p-n Junctions”

Xiaoying Zhang and Zhuoyuan Chen\*

5 Received (in XXX, XXX) Xth XXXXXXXXXX 20XX, Accepted Xth XXXXXXXXXX 20XX

DOI: 10.1039/b000000x

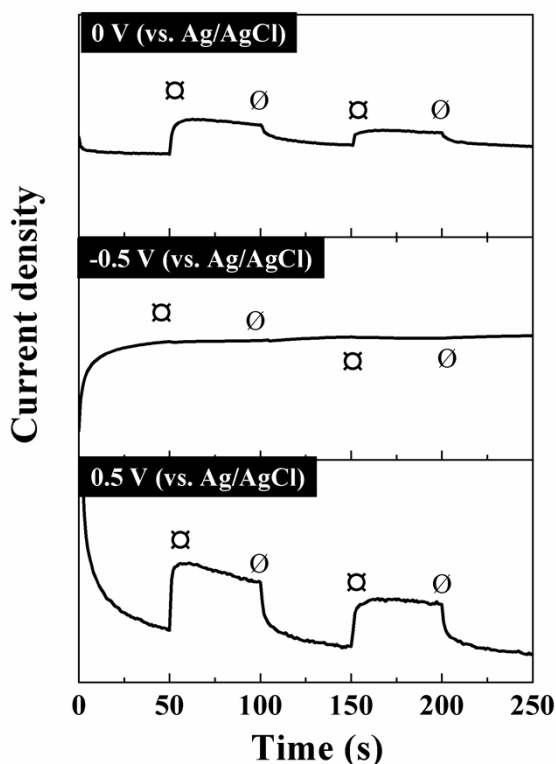

10 Fig. S1 The i-t curves of RGO-HMT 650 were studied at different bias voltage of 0 V, 0.5 V and -0.5 V (vs. Ag/AgCl) under visible light irradiation.

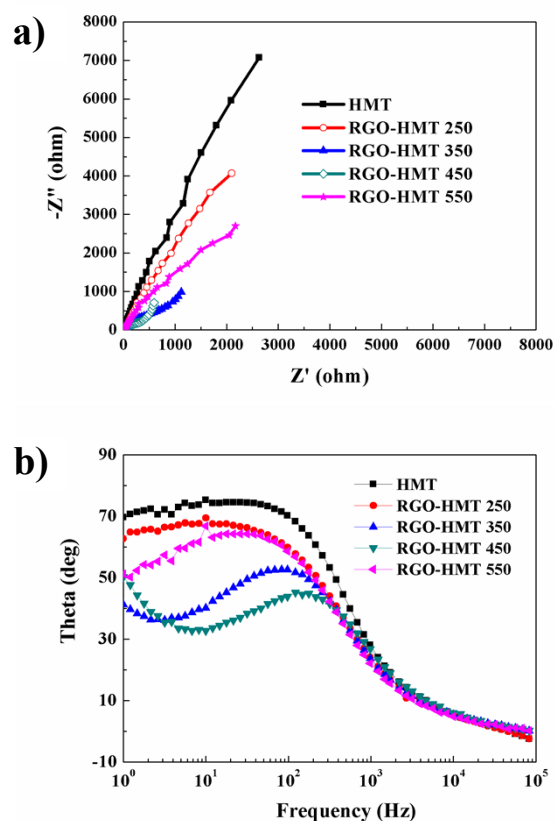

15 Fig.S2 Full range of Nyquist plots (a) and Bode plots (b) of HMT and RGO-HMT samples with different temperature in Nyquist plots in 0.5 M NaSO<sub>4</sub> under dark at a dc potential of 0 V vs. Ag/AgCl with an ac potential of 5 mV between frequency range from 100 kHz to 1 Hz.

20

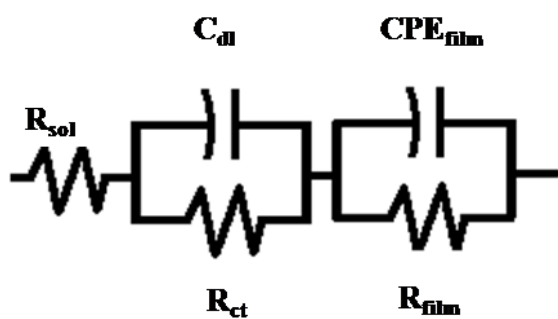

5 Fig. S3 Equivalent circuit model.  $R_{sol}$  is the solution resistance;  $R_{film}$  and  $CPE_{film}$  are the resistance and capacitance of the thin-film photoelectrode, respectively;  $R_{ct}$  is charge transfer resistance; and  $C_{dl}$  is double layer capacitance.

10
